# Supplementary material for: Addition of phenylacetylene to a magnesium complex of monoiminoacenaphtheneone (dpp-mian)
Source: Royal Society of Chemistry journal article supplement (doi:10.1039/c5dt03174e), 2015-01-01

Supporting Information to

**Addition of Phenylacetylene to Magnesium Complex of  
Monoiminoacenaphtheneone (dpp-mian)**

S D. A. Razborov,<sup>a</sup> A. N. Lukoyanov,<sup>a</sup> E. V. Baranov<sup>a</sup> and I. L. Fedushkin<sup>a,†</sup>

<sup>a</sup> *G.A. Razuvaev Institute of Organometallic Chemistry of Russian Academy of Sciences, Tropinina 49, Nizhny Novgorod, 603950, Russian Federation*

10

**Figure S1.** <sup>1</sup>H NMR spectrum of compound **8** in C<sub>6</sub>D<sub>6</sub>.

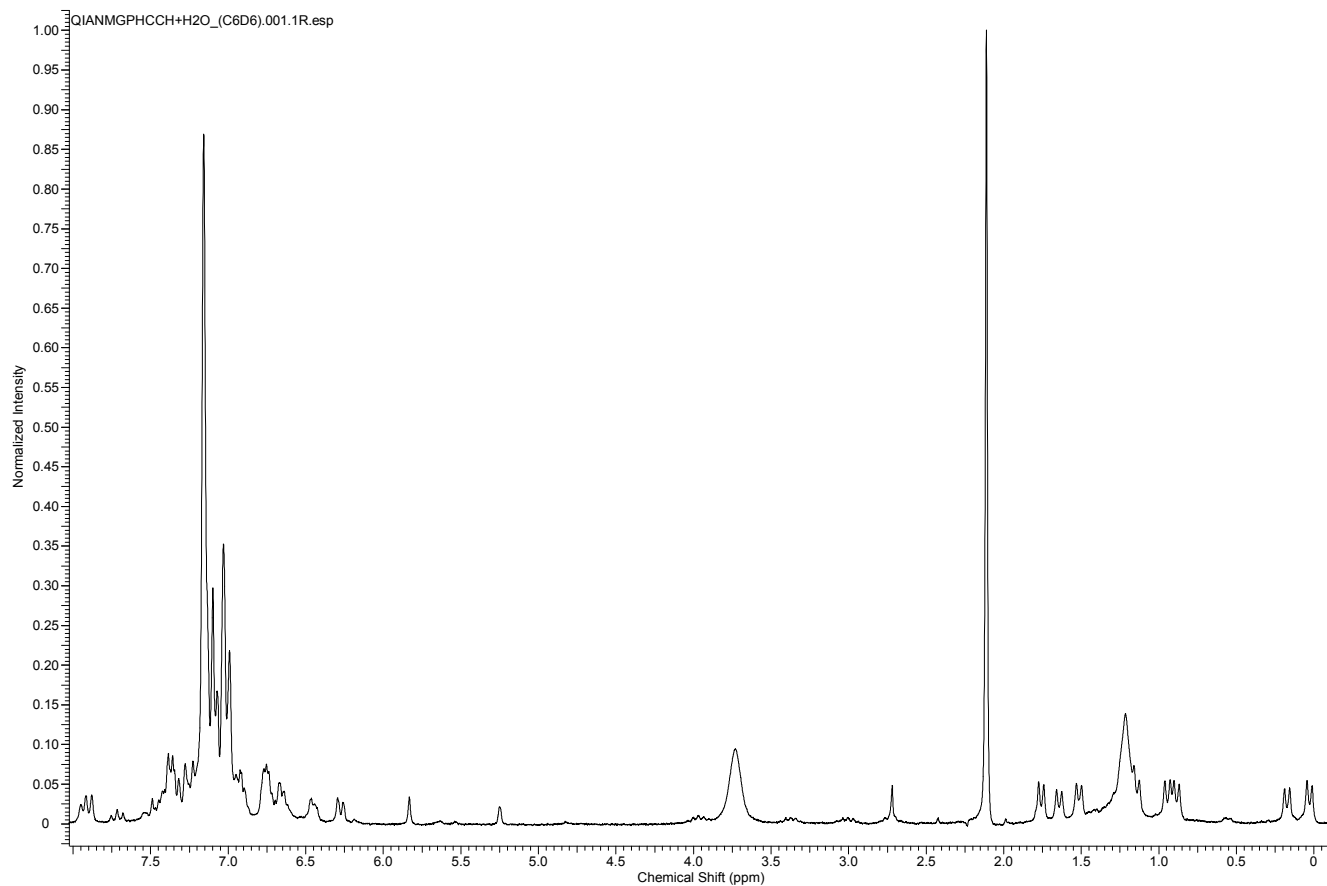

15

**Figure S2.**  $^1\text{H}$  NMR spectrum of compound **8** in  $\text{CDCl}_3$  (from  $\text{THF-d}_8$ ).

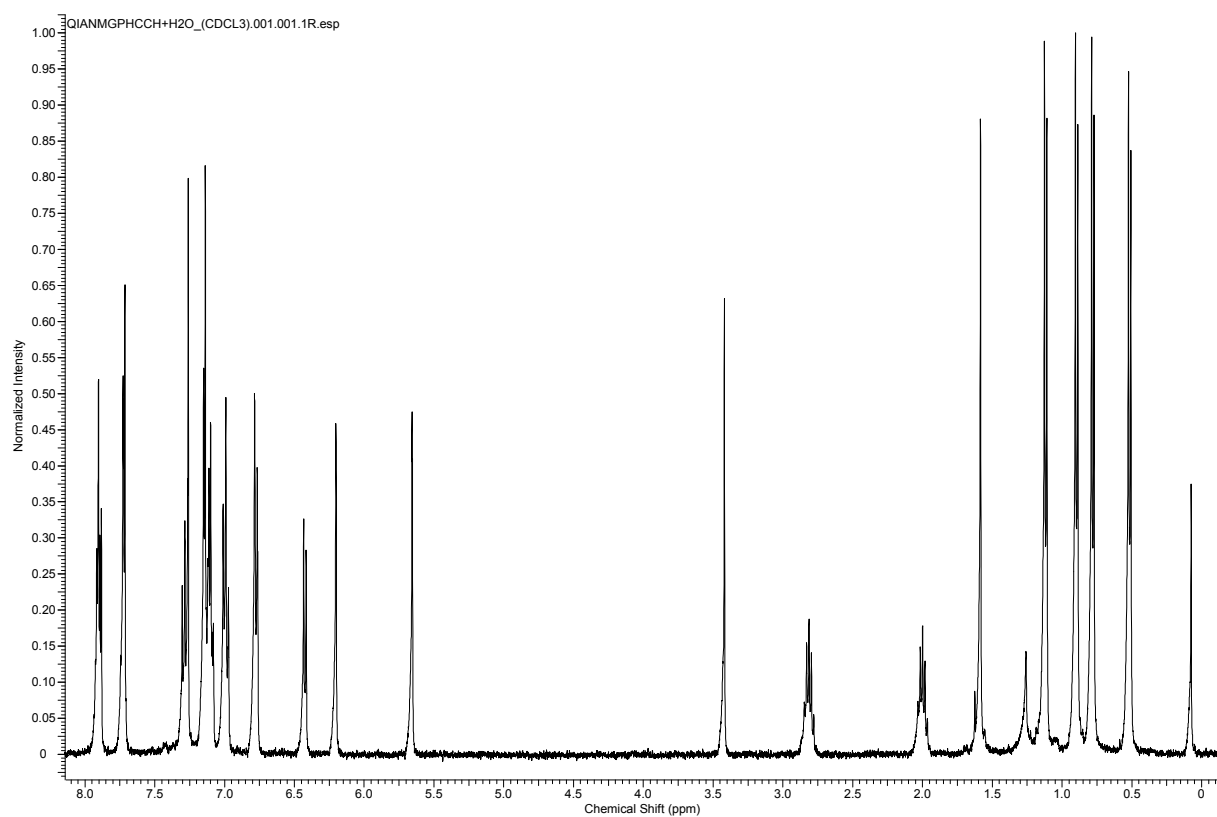

**5 Figure S3.**  $^1\text{H}$ - $^1\text{H}$  COSY NMR spectrum of compound **7** in  $\text{C}_6\text{D}_6$ .

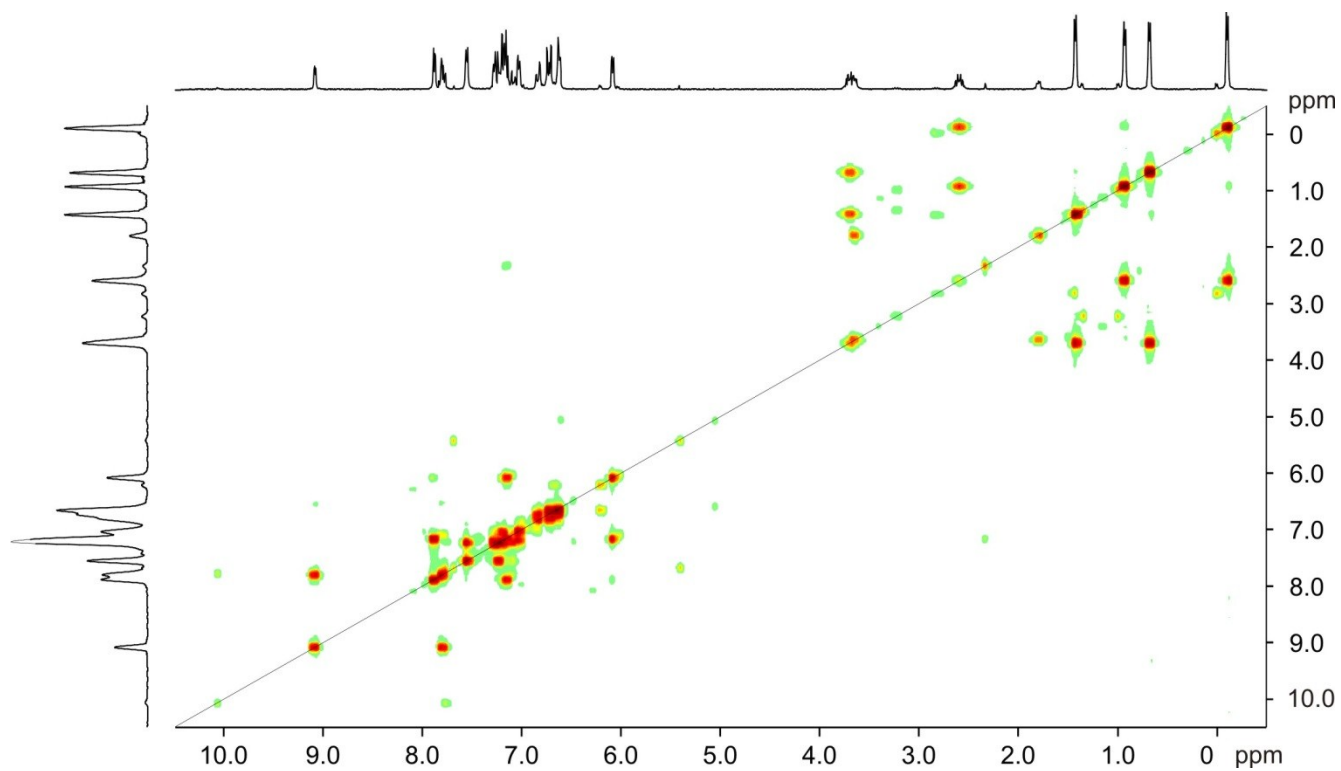

**Figure S4.** UV-VIS spectrum of compound **3** in toluene.

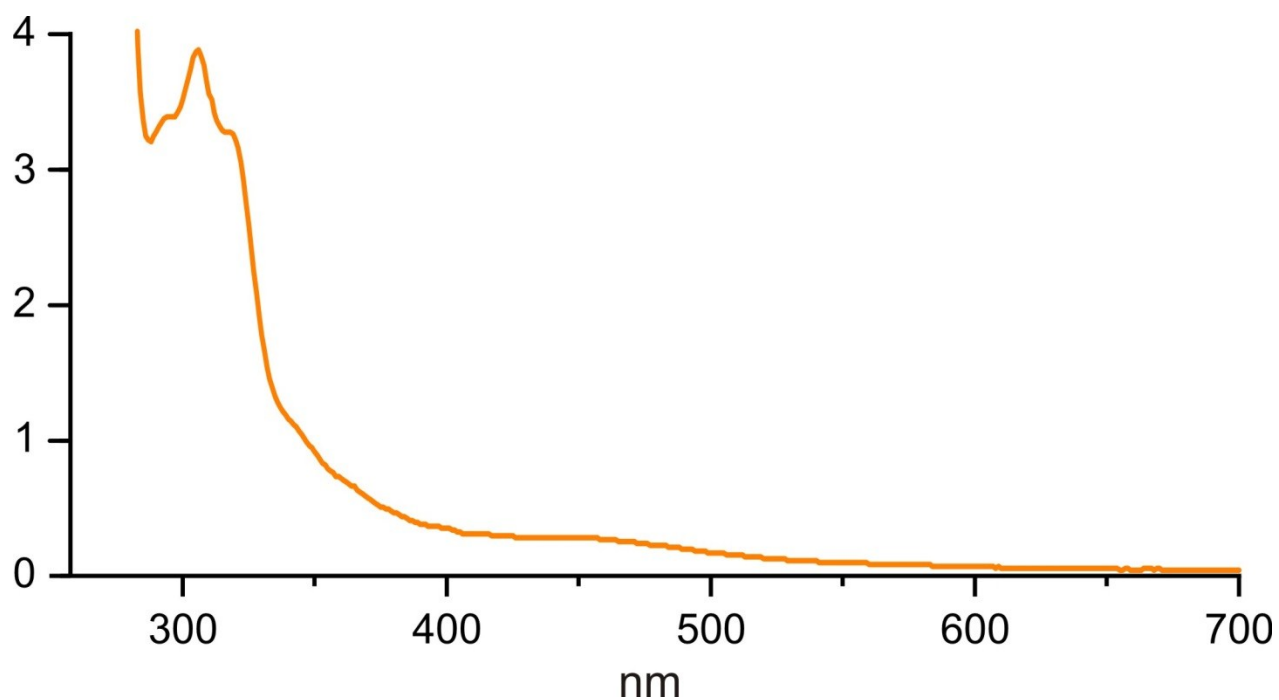

**Figure S5.** UV-VIS spectrum of compound **4** in THF.

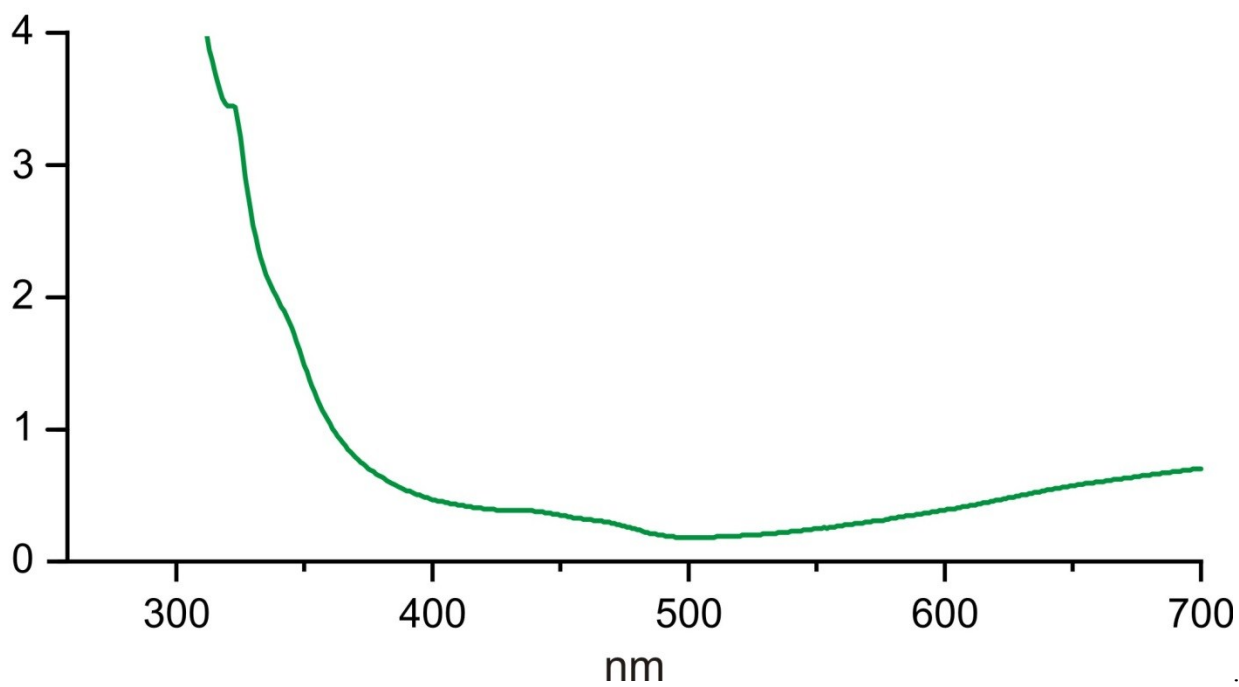

**Figure S6.** UV-VIS spectrum of compound **5** in toluene.

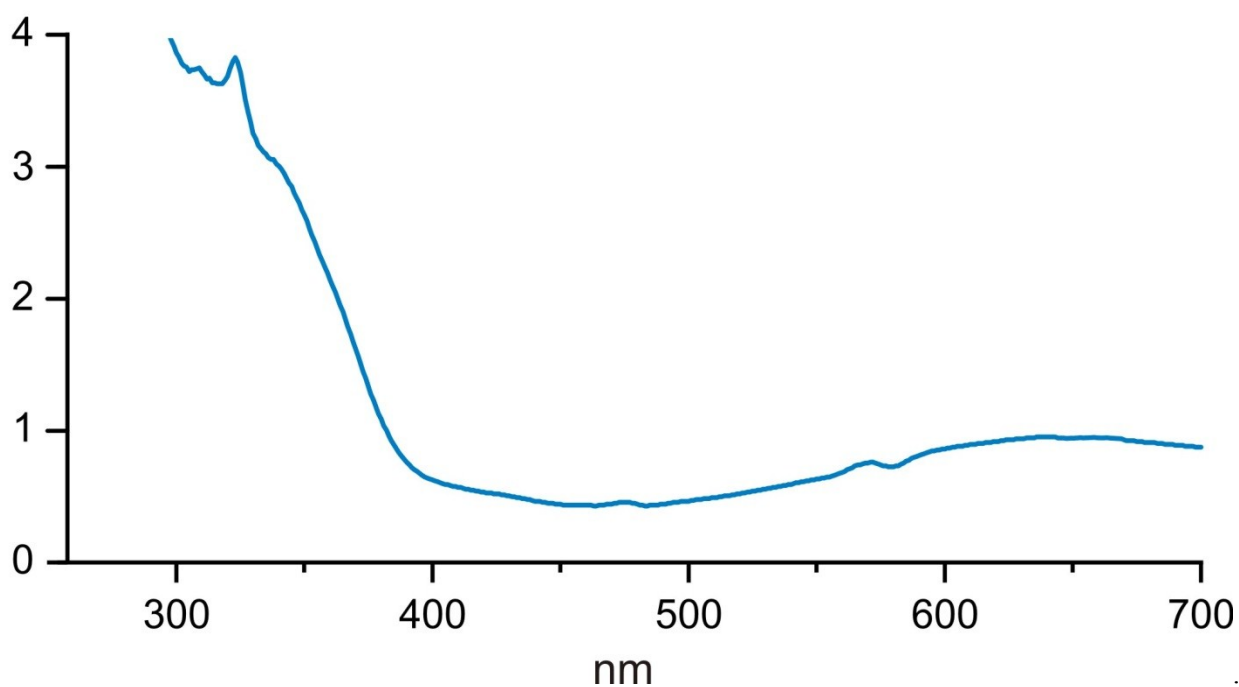

**Figure S7.** UV-VIS spectrum of compound **7** in toluene.

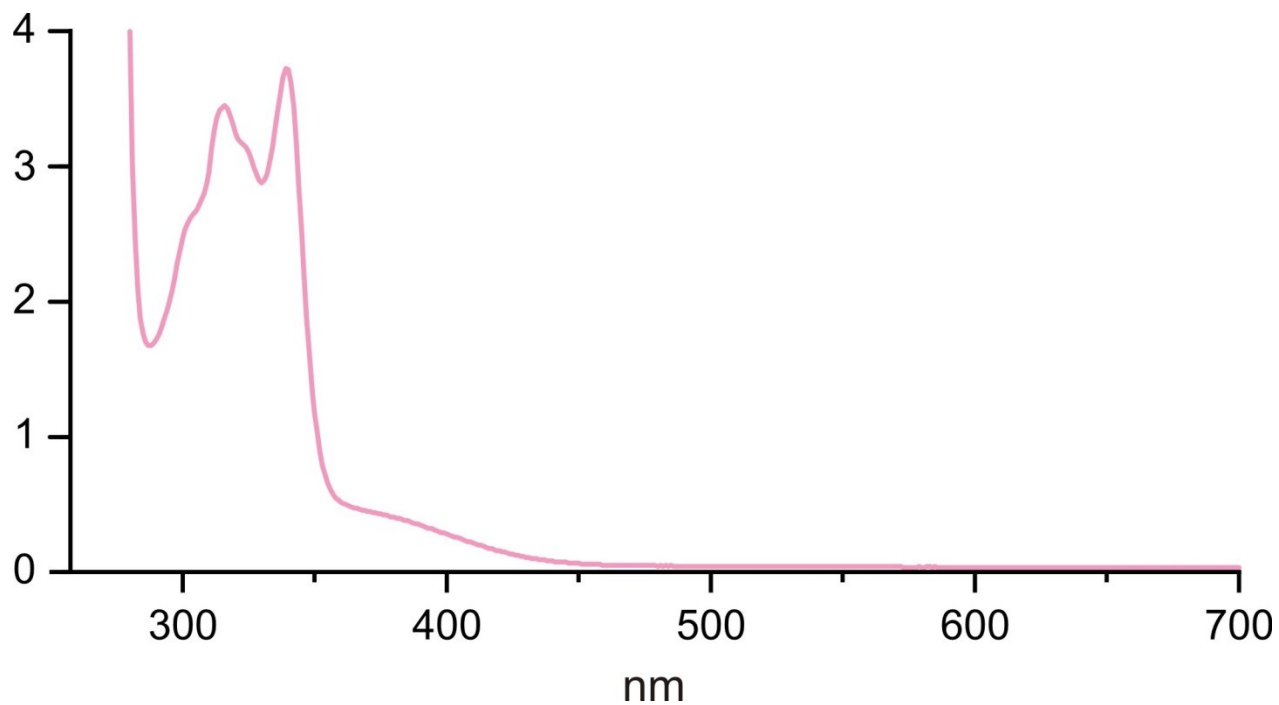

**Figure S8.** UV-VIS spectrum of compound **7** in toluene.

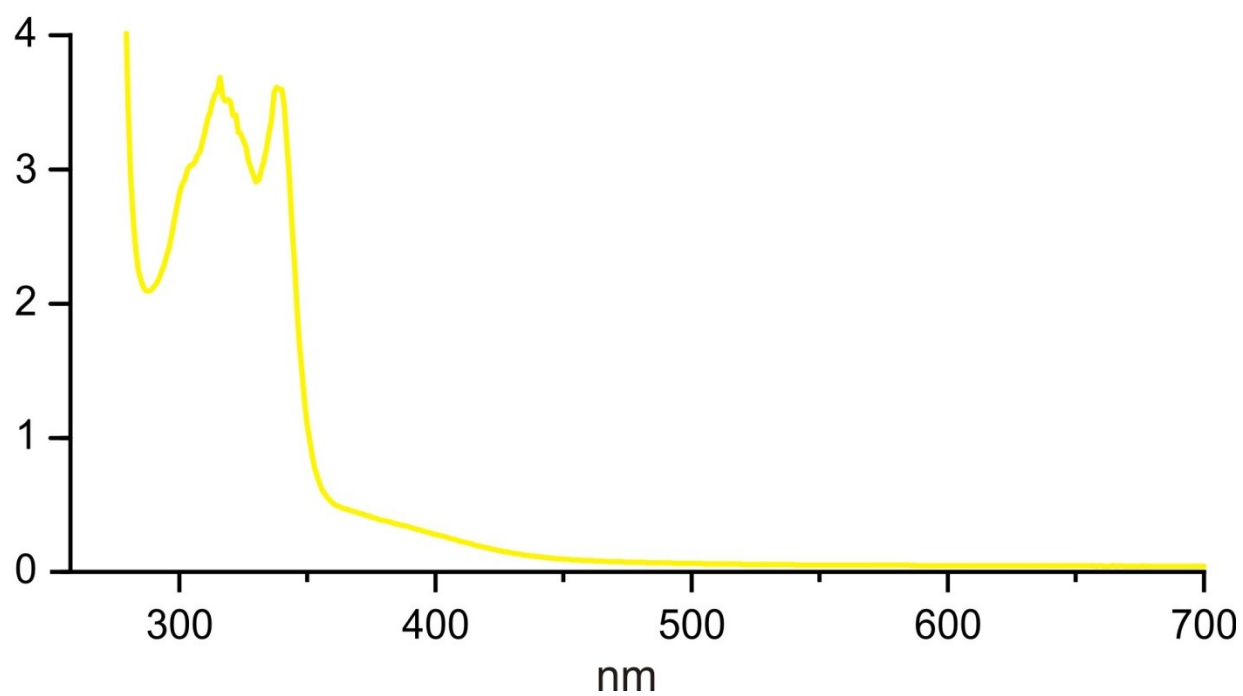

**5 Figure S8.**  $^{13}\text{C}$  NMR spectrum of compound **3** in  $\text{CDCl}_3$ .

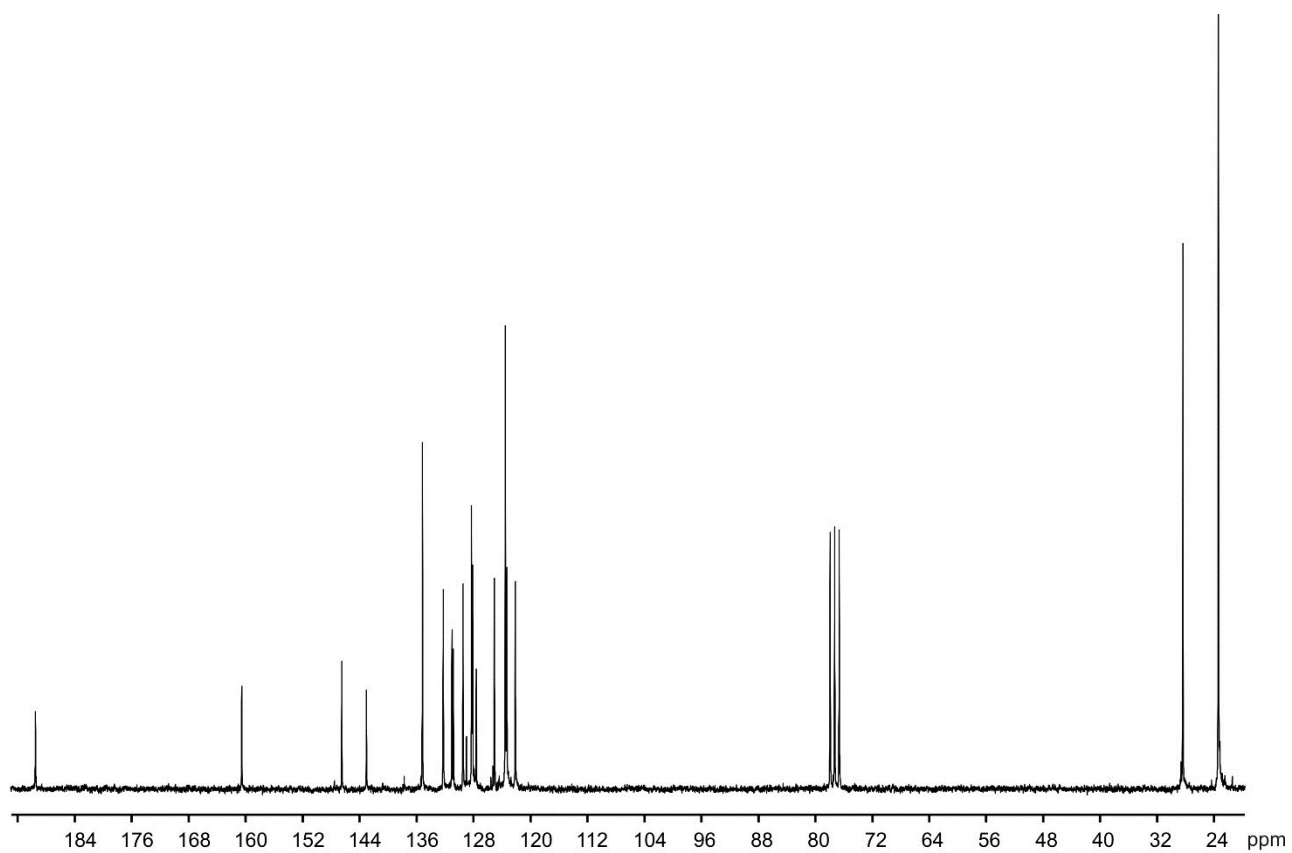

**Figure S9.**  $^{13}\text{C}$  NMR spectrum of compound **4** in  $\text{thf-d}_8$ .

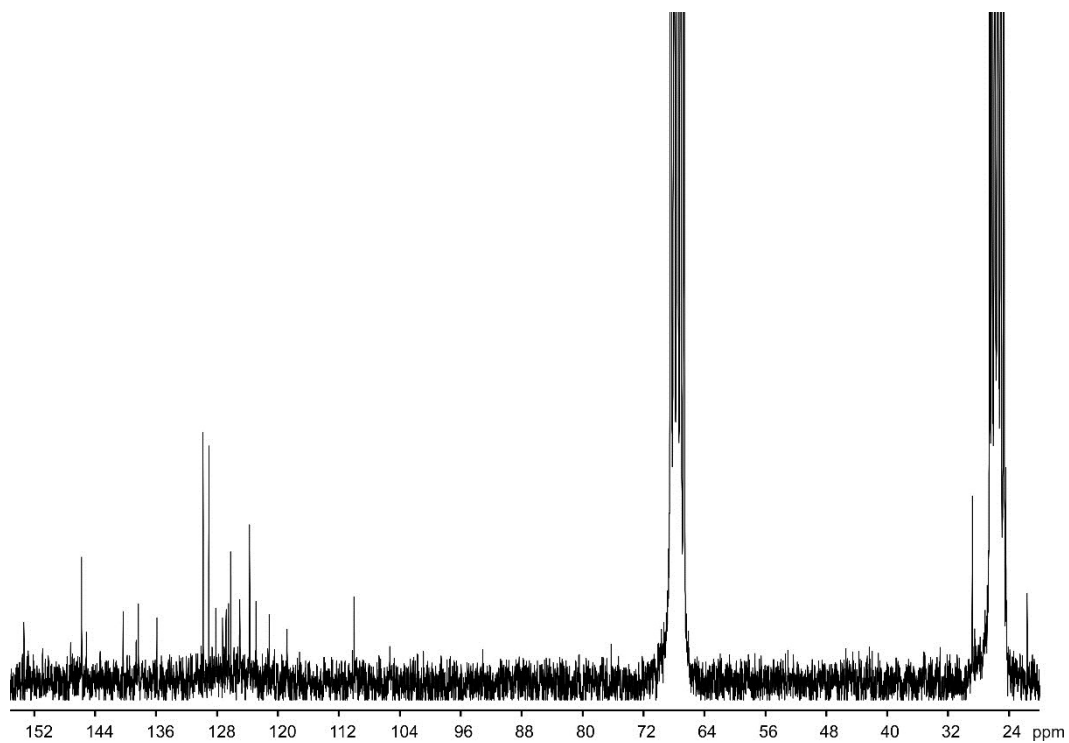

**5 Figure S10.**  $^{13}\text{C}$  NMR spectrum of compound **5** in  $\text{C}_6\text{D}_6$ .

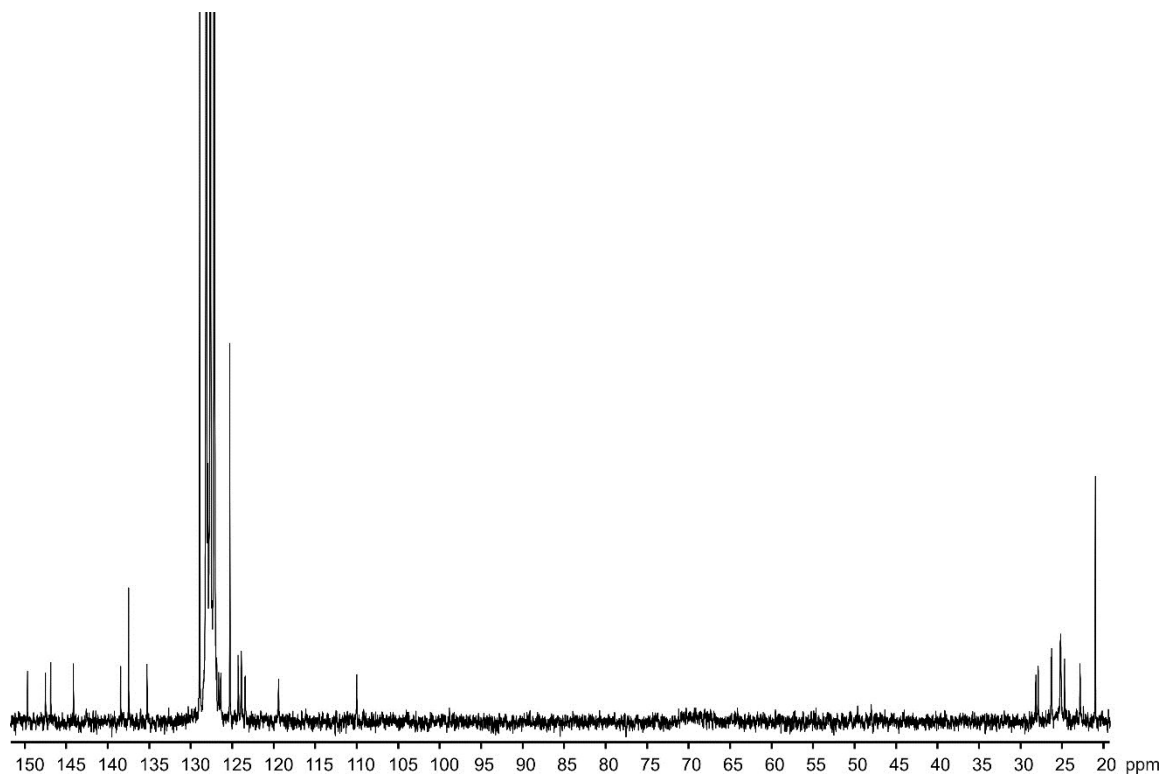

**Figure S11.**  $^{13}\text{C}$  NMR spectrum of compound **7** in  $\text{C}_6\text{D}_6$ .

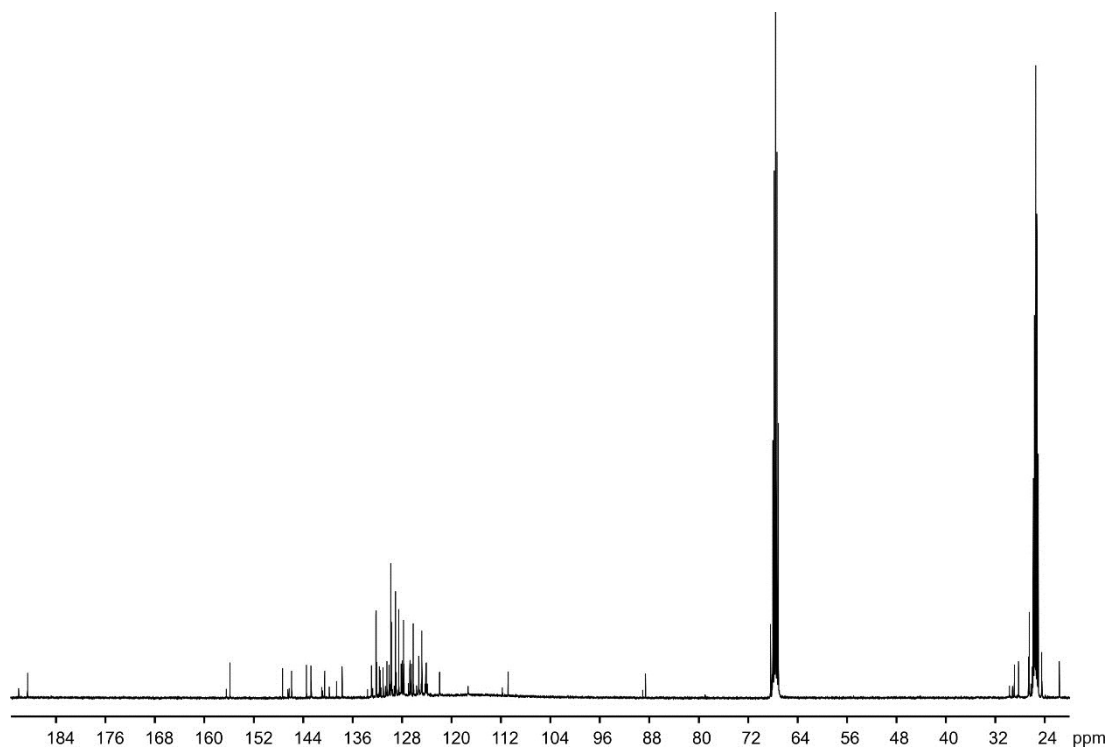

**5 Figure S12.**  $^{13}\text{C}$  NMR spectrum of compound **8** in  $\text{CDCl}_3$ .

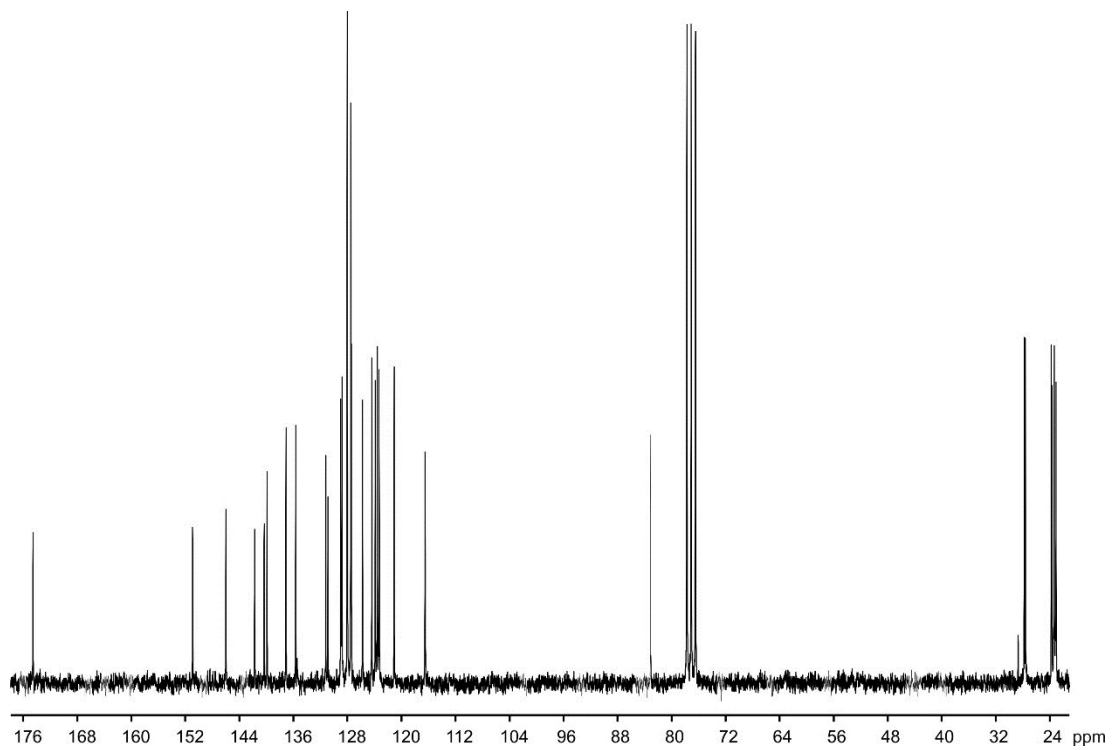

**Figure S13.**  $^1\text{H}$ - $^{13}\text{C}$  COSY NMR spectrum of compound **7** in  $\text{thf-d}_8$ .

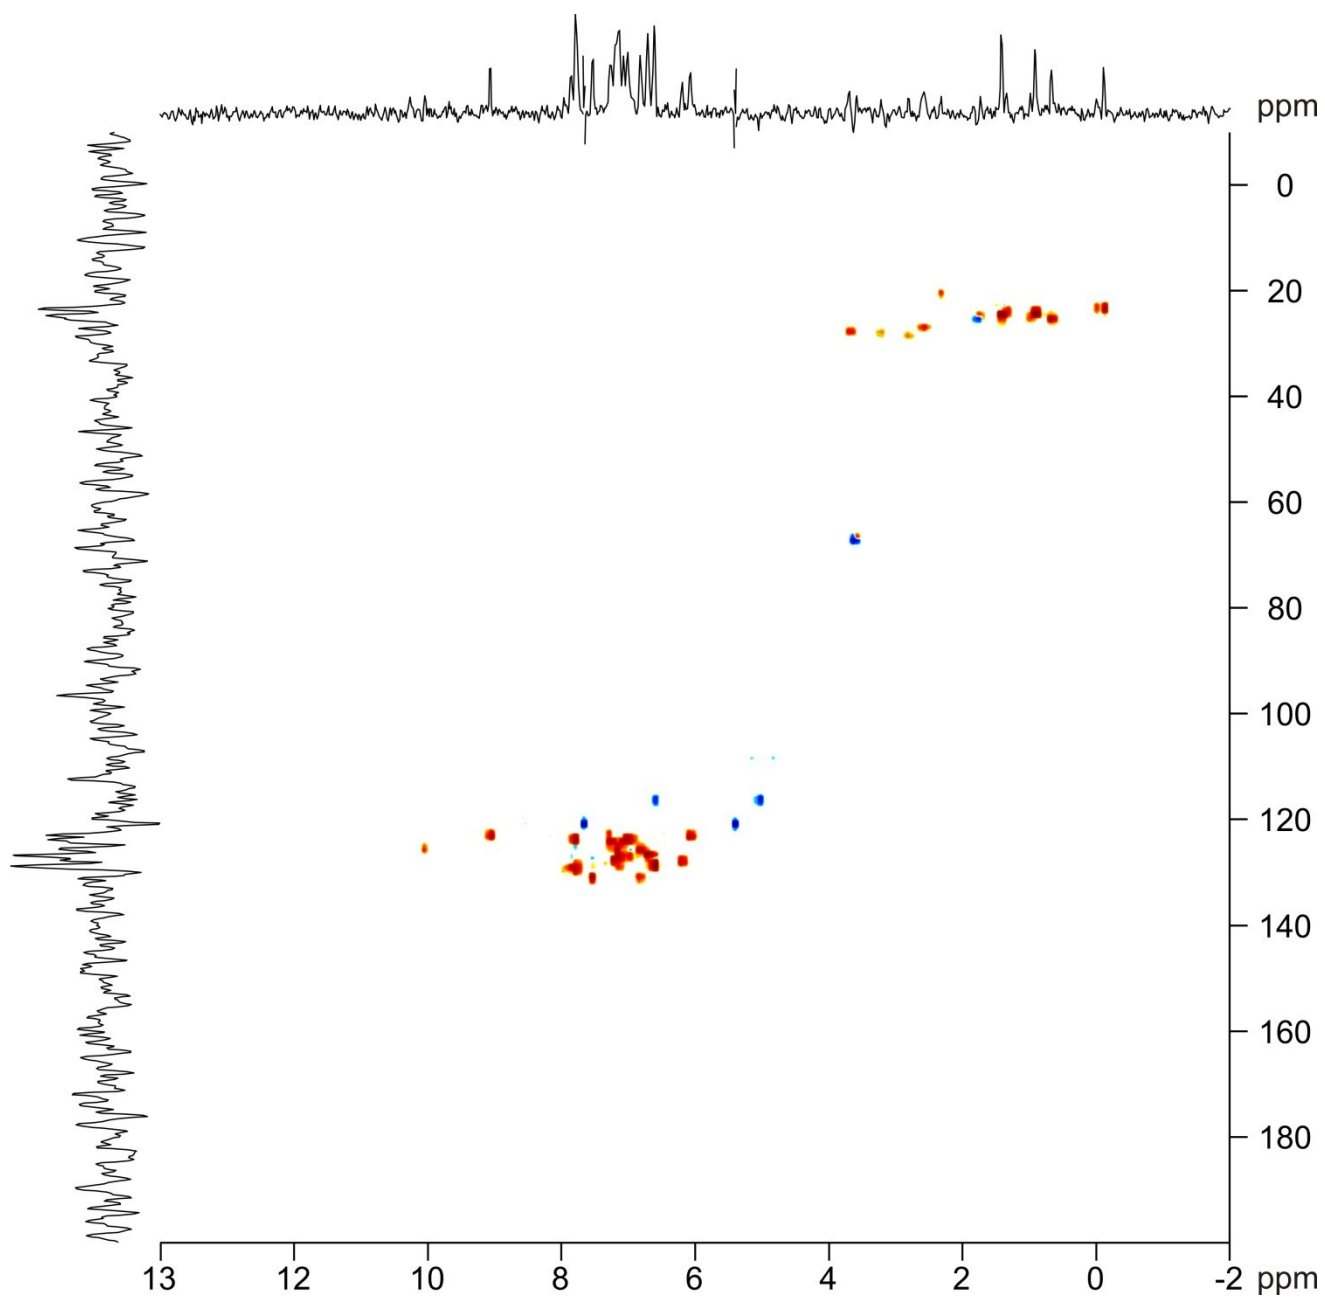

Supplement: c5dt03174e1.pdf [file c5dt03174e1.pdf]
